# Supplementary material for: Automated Earnings Forecasts: Beat Analysts or Combine and Conquer?
Source: Atypon-hosted journal article supplement (doi:10.1287/mnsc.2017.2864), 2017-10-27
Supplement: mnsc.2017.2864-sm.pdf [file mnsc.2017.2864-sm.pdf]

— ONLINE APPENDIX —

Automated Earnings Forecasts:  
Beat Analysts or Combine and Conquer?

Table OA.1:  $\lambda_{p,h}^{beat}$  and  $\lambda_{p,h}^{conquer}$  Bootstrap Distributions by Dispersion and Size Portfolios with a Forecast Horizon of  $h=3$  Months

| Portfolio, $p$                                                                                                                                     | $\lambda_{p,h}^{beat}$    | (p-value) | Bootstrap Distribution |       |       |       |       |       |       |       |       |
|----------------------------------------------------------------------------------------------------------------------------------------------------|---------------------------|-----------|------------------------|-------|-------|-------|-------|-------|-------|-------|-------|
|                                                                                                                                                    |                           |           | 1%                     | 5%    | 10%   | 25%   | 50%   | 75%   | 90%   | 95%   | 99%   |
| Panel A: $\lambda_{p,h}^{beat}$ for dispersion portfolios, $p$ , with a forecast horizon of $h=3$ months prior to the end of the fiscal quarter    |                           |           |                        |       |       |       |       |       |       |       |       |
| 1 (Low)                                                                                                                                            | 1.234                     | (1.00)    | 1.154                  | 1.176 | 1.184 | 1.204 | 1.229 | 1.252 | 1.278 | 1.294 | 1.320 |
| 2                                                                                                                                                  | 1.084                     | (1.00)    | 1.014                  | 1.039 | 1.046 | 1.063 | 1.086 | 1.104 | 1.124 | 1.133 | 1.155 |
| 3                                                                                                                                                  | 1.032                     | (0.95)    | 0.978                  | 1.000 | 1.007 | 1.017 | 1.034 | 1.048 | 1.062 | 1.075 | 1.101 |
| 4                                                                                                                                                  | 0.874***                  | (0.00)    | 0.820                  | 0.832 | 0.840 | 0.861 | 0.871 | 0.887 | 0.896 | 0.904 | 0.919 |
| 5 (High)                                                                                                                                           | 0.779***                  | (0.00)    | 0.733                  | 0.744 | 0.753 | 0.765 | 0.780 | 0.792 | 0.805 | 0.816 | 0.831 |
| Panel B: $\lambda_{p,h}^{beat}$ for size portfolios, $p$ , with a forecast horizon of $h=3$ months prior to the end of the fiscal quarter          |                           |           |                        |       |       |       |       |       |       |       |       |
| 1 (Small)                                                                                                                                          | 0.863***                  | (0.00)    | 0.812                  | 0.819 | 0.832 | 0.846 | 0.863 | 0.879 | 0.894 | 0.901 | 0.920 |
| 2                                                                                                                                                  | 0.976                     | (0.18)    | 0.920                  | 0.938 | 0.947 | 0.961 | 0.973 | 0.993 | 1.011 | 1.022 | 1.038 |
| 3                                                                                                                                                  | 0.975                     | (0.18)    | 0.919                  | 0.933 | 0.945 | 0.959 | 0.977 | 0.996 | 1.006 | 1.013 | 1.023 |
| 4                                                                                                                                                  | 0.935***                  | (0.00)    | 0.865                  | 0.885 | 0.894 | 0.910 | 0.929 | 0.948 | 0.961 | 0.971 | 0.988 |
| 5 (Large)                                                                                                                                          | 1.015                     | (0.72)    | 0.949                  | 0.967 | 0.977 | 0.997 | 1.019 | 1.050 | 1.065 | 1.079 | 1.105 |
| Portfolio, $p$                                                                                                                                     | $\lambda_{p,h}^{conquer}$ | (p-value) | Bootstrap Distribution |       |       |       |       |       |       |       |       |
|                                                                                                                                                    |                           |           | 1%                     | 5%    | 10%   | 25%   | 50%   | 75%   | 90%   | 95%   | 99%   |
| Panel C: $\lambda_{p,h}^{conquer}$ for dispersion portfolios, $p$ , with a forecast horizon of $h=3$ months prior to the end of the fiscal quarter |                           |           |                        |       |       |       |       |       |       |       |       |
| 1 (Low)                                                                                                                                            | 0.903***                  | (0.00)    | 0.863                  | 0.872 | 0.879 | 0.890 | 0.904 | 0.916 | 0.928 | 0.935 | 0.953 |
| 2                                                                                                                                                  | 0.883***                  | (0.00)    | 0.838                  | 0.852 | 0.857 | 0.868 | 0.879 | 0.892 | 0.904 | 0.907 | 0.923 |
| 3                                                                                                                                                  | 0.880***                  | (0.00)    | 0.847                  | 0.855 | 0.860 | 0.869 | 0.878 | 0.888 | 0.901 | 0.907 | 0.920 |
| 4                                                                                                                                                  | 0.809***                  | (0.00)    | 0.773                  | 0.782 | 0.788 | 0.797 | 0.808 | 0.819 | 0.827 | 0.831 | 0.841 |
| 5 (High)                                                                                                                                           | 0.753***                  | (0.00)    | 0.717                  | 0.724 | 0.729 | 0.739 | 0.751 | 0.764 | 0.770 | 0.774 | 0.791 |
| Panel D: $\lambda_{p,h}^{conquer}$ for size portfolios, $p$ , with a forecast horizon of $h=3$ months prior to the end of the fiscal quarter       |                           |           |                        |       |       |       |       |       |       |       |       |
| 1 (Small)                                                                                                                                          | 0.759***                  | (0.00)    | 0.721                  | 0.734 | 0.739 | 0.748 | 0.762 | 0.773 | 0.780 | 0.787 | 0.792 |
| 2                                                                                                                                                  | 0.838***                  | (0.00)    | 0.799                  | 0.811 | 0.817 | 0.828 | 0.837 | 0.849 | 0.858 | 0.865 | 0.878 |
| 3                                                                                                                                                  | 0.821***                  | (0.00)    | 0.781                  | 0.796 | 0.805 | 0.813 | 0.824 | 0.835 | 0.844 | 0.847 | 0.857 |
| 4                                                                                                                                                  | 0.779***                  | (0.00)    | 0.744                  | 0.751 | 0.759 | 0.768 | 0.778 | 0.790 | 0.801 | 0.807 | 0.816 |
| 5 (Large)                                                                                                                                          | 0.815***                  | (0.00)    | 0.774                  | 0.785 | 0.796 | 0.807 | 0.819 | 0.830 | 0.844 | 0.853 | 0.871 |

Table OA.2:  $\lambda_{p,h}^{beat}$  Bootstrap Distributions by Industry Portfolio,  $p$ , and Forecast Horizon,  $h$

| Industry<br>Portfolio, $p$                                                                                                                    | $\lambda_{p,h}^{beat}$ | (p-value) | Bootstrap Distribution |       |       |       |       |       |       |       |       |
|-----------------------------------------------------------------------------------------------------------------------------------------------|------------------------|-----------|------------------------|-------|-------|-------|-------|-------|-------|-------|-------|
|                                                                                                                                               |                        |           | 1%                     | 5%    | 10%   | 25%   | 50%   | 75%   | 90%   | 95%   | 99%   |
| Panel A: $\lambda_{p,h}^{beat}$ for industry portfolios, $p$ , with a forecast horizon of $h=0$ months prior to the end of the fiscal quarter |                        |           |                        |       |       |       |       |       |       |       |       |
| NODUR                                                                                                                                         | 1.681                  | (1.00)    | 1.514                  | 1.563 | 1.590 | 1.632 | 1.682 | 1.734 | 1.791 | 1.826 | 1.892 |
| DURBL                                                                                                                                         | 1.242                  | (1.00)    | 1.069                  | 1.118 | 1.145 | 1.185 | 1.232 | 1.279 | 1.325 | 1.350 | 1.400 |
| MANUF                                                                                                                                         | 1.294                  | (1.00)    | 1.224                  | 1.245 | 1.255 | 1.273 | 1.292 | 1.311 | 1.326 | 1.335 | 1.353 |
| ENRGY                                                                                                                                         | 1.221                  | (1.00)    | 1.100                  | 1.134 | 1.153 | 1.186 | 1.228 | 1.268 | 1.309 | 1.333 | 1.385 |
| HITEC                                                                                                                                         | 1.133                  | (1.00)    | 1.067                  | 1.086 | 1.096 | 1.112 | 1.131 | 1.150 | 1.166 | 1.177 | 1.198 |
| TELCM                                                                                                                                         | 1.196                  | (0.88)    | 0.803                  | 0.927 | 0.981 | 1.090 | 1.219 | 1.373 | 1.565 | 1.673 | 1.921 |
| SHOPS                                                                                                                                         | 1.380                  | (1.00)    | 1.289                  | 1.313 | 1.326 | 1.351 | 1.377 | 1.404 | 1.428 | 1.443 | 1.470 |
| HLTH                                                                                                                                          | 1.157                  | (1.00)    | 1.052                  | 1.081 | 1.097 | 1.127 | 1.161 | 1.197 | 1.229 | 1.250 | 1.287 |
| UTILS                                                                                                                                         | 0.943                  | (0.36)    | 0.805                  | 0.862 | 0.881 | 0.917 | 0.967 | 1.021 | 1.066 | 1.100 | 1.183 |
| OTHER                                                                                                                                         | 1.277                  | (1.00)    | 1.145                  | 1.182 | 1.202 | 1.235 | 1.270 | 1.307 | 1.339 | 1.358 | 1.393 |
| All                                                                                                                                           | 1.251                  | (1.00)    | 1.217                  | 1.226 | 1.231 | 1.240 | 1.250 | 1.261 | 1.270 | 1.276 | 1.286 |
| Panel B: $\lambda_{p,h}^{beat}$ for industry portfolios, $p$ , with a forecast horizon of $h=3$ months prior to the end of the fiscal quarter |                        |           |                        |       |       |       |       |       |       |       |       |
| NODUR                                                                                                                                         | 1.249                  | (1.00)    | 1.123                  | 1.154 | 1.173 | 1.207 | 1.247 | 1.294 | 1.338 | 1.363 | 1.414 |
| DURBL                                                                                                                                         | 0.911                  | (0.12)    | 0.778                  | 0.813 | 0.834 | 0.870 | 0.912 | 0.961 | 1.005 | 1.031 | 1.083 |
| MANUF                                                                                                                                         | 0.904***               | (0.00)    | 0.863                  | 0.875 | 0.882 | 0.893 | 0.906 | 0.919 | 0.933 | 0.942 | 0.958 |
| ENRGY                                                                                                                                         | 0.912**                | (0.05)    | 0.785                  | 0.816 | 0.835 | 0.868 | 0.903 | 0.942 | 0.978 | 1.000 | 1.042 |
| HITEC                                                                                                                                         | 0.866***               | (0.00)    | 0.816                  | 0.829 | 0.836 | 0.849 | 0.863 | 0.877 | 0.891 | 0.899 | 0.914 |
| TELCM                                                                                                                                         | 0.870                  | (0.25)    | 0.393                  | 0.532 | 0.635 | 0.734 | 0.854 | 0.995 | 1.181 | 1.366 | 1.650 |
| SHOPS                                                                                                                                         | 1.024                  | (0.77)    | 0.949                  | 0.970 | 0.982 | 1.003 | 1.028 | 1.052 | 1.076 | 1.089 | 1.115 |
| HLTH                                                                                                                                          | 0.914**                | (0.03)    | 0.812                  | 0.836 | 0.851 | 0.879 | 0.911 | 0.944 | 0.973 | 0.990 | 1.025 |
| UTILS                                                                                                                                         | 0.839                  | (0.15)    | 0.648                  | 0.701 | 0.727 | 0.792 | 0.864 | 0.944 | 1.030 | 1.079 | 1.182 |
| OTHER                                                                                                                                         | 0.917**                | (0.02)    | 0.837                  | 0.860 | 0.874 | 0.895 | 0.918 | 0.943 | 0.966 | 0.981 | 1.014 |
| All                                                                                                                                           | 0.931***               | (0.00)    | 0.906                  | 0.914 | 0.918 | 0.924 | 0.932 | 0.939 | 0.946 | 0.951 | 0.959 |

Table OA.3:  $\lambda_{p,h}^{conquer}$  Bootstrap Distributions by Industry Portfolio,  $p$ , and Forecast Horizon,  $h$

| Industry<br>Portfolio, $p$                                                                                                                       | $\lambda_{p,h}^{conquer}$ | (p-value) | Bootstrap Distribution |       |       |       |       |       |       |       |       |
|--------------------------------------------------------------------------------------------------------------------------------------------------|---------------------------|-----------|------------------------|-------|-------|-------|-------|-------|-------|-------|-------|
|                                                                                                                                                  |                           |           | 1%                     | 5%    | 10%   | 25%   | 50%   | 75%   | 90%   | 95%   | 99%   |
| Panel A: $\lambda_{p,h}^{conquer}$ for industry portfolios, $p$ , with a forecast horizon of $h=0$ months prior to the end of the fiscal quarter |                           |           |                        |       |       |       |       |       |       |       |       |
| NODUR                                                                                                                                            | 0.898***                  | (0.00)    | 0.835                  | 0.855 | 0.864 | 0.883 | 0.902 | 0.924 | 0.945 | 0.958 | 0.985 |
| DURBL                                                                                                                                            | 0.923**                   | (0.02)    | 0.840                  | 0.861 | 0.873 | 0.895 | 0.920 | 0.947 | 0.971 | 0.984 | 1.007 |
| MANUF                                                                                                                                            | 0.921***                  | (0.00)    | 0.882                  | 0.892 | 0.898 | 0.908 | 0.920 | 0.933 | 0.944 | 0.951 | 0.962 |
| ENRGY                                                                                                                                            | 0.978                     | (0.29)    | 0.910                  | 0.929 | 0.939 | 0.959 | 0.982 | 1.004 | 1.024 | 1.038 | 1.063 |
| HITEC                                                                                                                                            | 0.882***                  | (0.00)    | 0.845                  | 0.855 | 0.860 | 0.869 | 0.880 | 0.891 | 0.900 | 0.905 | 0.916 |
| TELCM                                                                                                                                            | 0.932                     | (0.31)    | 0.658                  | 0.749 | 0.798 | 0.881 | 0.950 | 1.021 | 1.088 | 1.171 | 1.321 |
| SHOPS                                                                                                                                            | 0.896***                  | (0.00)    | 0.855                  | 0.867 | 0.874 | 0.884 | 0.897 | 0.909 | 0.921 | 0.929 | 0.942 |
| HLTH                                                                                                                                             | 0.834***                  | (0.00)    | 0.774                  | 0.792 | 0.802 | 0.819 | 0.837 | 0.858 | 0.876 | 0.887 | 0.908 |
| UTILS                                                                                                                                            | 0.737***                  | (0.00)    | 0.643                  | 0.672 | 0.689 | 0.717 | 0.749 | 0.778 | 0.817 | 0.838 | 0.890 |
| OTHER                                                                                                                                            | 0.916***                  | (0.00)    | 0.849                  | 0.868 | 0.878 | 0.894 | 0.913 | 0.932 | 0.949 | 0.958 | 0.978 |
| All                                                                                                                                              | 0.898***                  | (0.00)    | 0.878                  | 0.884 | 0.887 | 0.892 | 0.897 | 0.903 | 0.908 | 0.911 | 0.917 |
| Panel B: $\lambda_{p,h}^{conquer}$ for industry portfolios, $p$ , with a forecast horizon of $h=3$ months prior to the end of the fiscal quarter |                           |           |                        |       |       |       |       |       |       |       |       |
| NODUR                                                                                                                                            | 0.844***                  | (0.00)    | 0.777                  | 0.794 | 0.804 | 0.821 | 0.839 | 0.859 | 0.875 | 0.886 | 0.909 |
| DURBL                                                                                                                                            | 0.809***                  | (0.00)    | 0.724                  | 0.748 | 0.761 | 0.783 | 0.809 | 0.834 | 0.859 | 0.874 | 0.901 |
| MANUF                                                                                                                                            | 0.785***                  | (0.00)    | 0.747                  | 0.757 | 0.763 | 0.773 | 0.783 | 0.792 | 0.801 | 0.806 | 0.817 |
| ENRGY                                                                                                                                            | 0.851***                  | (0.00)    | 0.764                  | 0.787 | 0.801 | 0.827 | 0.857 | 0.888 | 0.915 | 0.932 | 0.965 |
| HITEC                                                                                                                                            | 0.786***                  | (0.00)    | 0.751                  | 0.761 | 0.766 | 0.775 | 0.785 | 0.796 | 0.807 | 0.814 | 0.826 |
| TELCM                                                                                                                                            | 0.782*                    | (0.07)    | 0.357                  | 0.487 | 0.544 | 0.644 | 0.747 | 0.851 | 0.929 | 1.042 | 1.219 |
| SHOPS                                                                                                                                            | 0.815***                  | (0.00)    | 0.769                  | 0.782 | 0.789 | 0.802 | 0.817 | 0.831 | 0.844 | 0.853 | 0.870 |
| HLTH                                                                                                                                             | 0.798***                  | (0.00)    | 0.723                  | 0.743 | 0.753 | 0.773 | 0.796 | 0.818 | 0.839 | 0.851 | 0.871 |
| UTILS                                                                                                                                            | 0.774***                  | (0.00)    | 0.637                  | 0.673 | 0.694 | 0.736 | 0.781 | 0.831 | 0.879 | 0.912 | 0.976 |
| OTHER                                                                                                                                            | 0.810***                  | (0.00)    | 0.745                  | 0.764 | 0.773 | 0.790 | 0.809 | 0.829 | 0.847 | 0.858 | 0.881 |
| All                                                                                                                                              | 0.792***                  | (0.00)    | 0.774                  | 0.779 | 0.782 | 0.787 | 0.793 | 0.799 | 0.804 | 0.807 | 0.814 |

Table OA.4:  $\lambda_{p,h}^{beat}$  Bootstrap Distributions by Calendar-year Portfolio,  $p$ , and Forecast Horizon,  $h$

| Calendar-year<br>Portfolio, $p$                                                                                                                    | $\lambda_{p,h}^{beat}$ | (p-value) | Bootstrap Distribution |       |       |       |       |       |       |       |       |
|----------------------------------------------------------------------------------------------------------------------------------------------------|------------------------|-----------|------------------------|-------|-------|-------|-------|-------|-------|-------|-------|
|                                                                                                                                                    |                        |           | 1%                     | 5%    | 10%   | 25%   | 50%   | 75%   | 90%   | 95%   | 99%   |
| Panel A: $\lambda_{p,h}^{beat}$ for calendar-year portfolios, $p$ , with a forecast horizon of $h=0$ months prior to the end of the fiscal quarter |                        |           |                        |       |       |       |       |       |       |       |       |
| 2000                                                                                                                                               | 1.411                  | (1.00)    | 1.225                  | 1.280 | 1.307 | 1.357 | 1.411 | 1.470 | 1.524 | 1.563 | 1.641 |
| 2001                                                                                                                                               | 1.375                  | (1.00)    | 1.189                  | 1.244 | 1.273 | 1.324 | 1.378 | 1.428 | 1.478 | 1.509 | 1.561 |
| 2002                                                                                                                                               | 1.375                  | (1.00)    | 1.244                  | 1.283 | 1.304 | 1.338 | 1.381 | 1.434 | 1.487 | 1.521 | 1.598 |
| 2003                                                                                                                                               | 1.463                  | (1.00)    | 1.274                  | 1.328 | 1.360 | 1.404 | 1.458 | 1.513 | 1.564 | 1.596 | 1.651 |
| 2004                                                                                                                                               | 1.383                  | (1.00)    | 1.231                  | 1.275 | 1.296 | 1.338 | 1.389 | 1.442 | 1.493 | 1.519 | 1.575 |
| 2005                                                                                                                                               | 1.243                  | (1.00)    | 1.124                  | 1.160 | 1.179 | 1.209 | 1.246 | 1.288 | 1.331 | 1.357 | 1.405 |
| 2006                                                                                                                                               | 1.194                  | (1.00)    | 1.090                  | 1.123 | 1.139 | 1.164 | 1.194 | 1.230 | 1.265 | 1.287 | 1.329 |
| 2007                                                                                                                                               | 1.240                  | (1.00)    | 1.112                  | 1.150 | 1.169 | 1.202 | 1.242 | 1.281 | 1.317 | 1.342 | 1.389 |
| 2008                                                                                                                                               | 1.165                  | (1.00)    | 1.056                  | 1.085 | 1.101 | 1.130 | 1.165 | 1.200 | 1.232 | 1.253 | 1.292 |
| 2009                                                                                                                                               | 1.148                  | (1.00)    | 1.021                  | 1.055 | 1.073 | 1.106 | 1.144 | 1.183 | 1.220 | 1.242 | 1.280 |
| 2010                                                                                                                                               | 1.105                  | (0.99)    | 1.001                  | 1.033 | 1.049 | 1.075 | 1.106 | 1.136 | 1.166 | 1.184 | 1.219 |
| 2011                                                                                                                                               | 1.177                  | (1.00)    | 1.069                  | 1.102 | 1.118 | 1.147 | 1.177 | 1.208 | 1.235 | 1.253 | 1.286 |
| 2012                                                                                                                                               | 1.192                  | (1.00)    | 1.071                  | 1.107 | 1.127 | 1.161 | 1.196 | 1.233 | 1.265 | 1.283 | 1.323 |
| 2013                                                                                                                                               | 1.210                  | (1.00)    | 1.112                  | 1.141 | 1.157 | 1.182 | 1.210 | 1.239 | 1.268 | 1.285 | 1.320 |
| 2014                                                                                                                                               | 1.239                  | (1.00)    | 1.147                  | 1.174 | 1.189 | 1.215 | 1.242 | 1.271 | 1.301 | 1.320 | 1.356 |
| Panel B: $\lambda_{p,h}^{beat}$ for calendar-year portfolios, $p$ , with a forecast horizon of $h=3$ months prior to the end of the fiscal quarter |                        |           |                        |       |       |       |       |       |       |       |       |
| 2000                                                                                                                                               | 1.030                  | (0.67)    | 0.862                  | 0.905 | 0.934 | 0.981 | 1.031 | 1.083 | 1.132 | 1.159 | 1.213 |
| 2001                                                                                                                                               | 0.729***               | (0.00)    | 0.611                  | 0.642 | 0.661 | 0.694 | 0.726 | 0.755 | 0.786 | 0.811 | 0.865 |
| 2002                                                                                                                                               | 0.914                  | (0.15)    | 0.747                  | 0.792 | 0.818 | 0.865 | 0.913 | 0.970 | 1.019 | 1.049 | 1.100 |
| 2003                                                                                                                                               | 0.929*                 | (0.10)    | 0.814                  | 0.848 | 0.865 | 0.895 | 0.929 | 0.964 | 0.998 | 1.020 | 1.060 |
| 2004                                                                                                                                               | 1.019                  | (0.68)    | 0.891                  | 0.929 | 0.948 | 0.989 | 1.033 | 1.079 | 1.128 | 1.149 | 1.201 |
| 2005                                                                                                                                               | 0.987                  | (0.34)    | 0.853                  | 0.892 | 0.909 | 0.941 | 0.978 | 1.014 | 1.047 | 1.068 | 1.108 |
| 2006                                                                                                                                               | 0.982                  | (0.39)    | 0.879                  | 0.909 | 0.926 | 0.953 | 0.985 | 1.021 | 1.052 | 1.070 | 1.106 |
| 2007                                                                                                                                               | 1.041                  | (0.76)    | 0.899                  | 0.942 | 0.964 | 1.001 | 1.041 | 1.083 | 1.121 | 1.145 | 1.184 |
| 2008                                                                                                                                               | 0.967                  | (0.24)    | 0.869                  | 0.897 | 0.913 | 0.940 | 0.967 | 0.998 | 1.028 | 1.045 | 1.074 |
| 2009                                                                                                                                               | 0.796***               | (0.00)    | 0.721                  | 0.741 | 0.752 | 0.774 | 0.797 | 0.824 | 0.848 | 0.863 | 0.892 |
| 2010                                                                                                                                               | 0.890***               | (0.00)    | 0.790                  | 0.815 | 0.833 | 0.856 | 0.883 | 0.910 | 0.934 | 0.948 | 0.972 |
| 2011                                                                                                                                               | 0.948                  | (0.12)    | 0.851                  | 0.882 | 0.897 | 0.921 | 0.949 | 0.978 | 1.004 | 1.019 | 1.047 |
| 2012                                                                                                                                               | 0.970                  | (0.17)    | 0.884                  | 0.907 | 0.920 | 0.941 | 0.966 | 0.991 | 1.012 | 1.024 | 1.052 |
| 2013                                                                                                                                               | 1.005                  | (0.47)    | 0.899                  | 0.927 | 0.943 | 0.968 | 0.996 | 1.026 | 1.052 | 1.067 | 1.096 |
| 2014                                                                                                                                               | 0.983                  | (0.35)    | 0.896                  | 0.922 | 0.935 | 0.959 | 0.985 | 1.011 | 1.037 | 1.055 | 1.088 |

Table OA.5:  $\lambda_{p,h}^{conquer}$  Bootstrap Distributions by Calendar-year Portfolio,  $p$ , and Forecast Horizon,  $h$

| Calendar-year<br>Portfolio, $p$                                                                                                                       | $\lambda_{p,h}^{conquer}$ | (p-value) | Bootstrap Distribution |       |       |       |       |       |       |       |       |
|-------------------------------------------------------------------------------------------------------------------------------------------------------|---------------------------|-----------|------------------------|-------|-------|-------|-------|-------|-------|-------|-------|
|                                                                                                                                                       |                           |           | 1%                     | 5%    | 10%   | 25%   | 50%   | 75%   | 90%   | 95%   | 99%   |
| Panel A: $\lambda_{p,h}^{conquer}$ for calendar-year portfolios, $p$ , with a forecast horizon of $h=0$ months prior to the end of the fiscal quarter |                           |           |                        |       |       |       |       |       |       |       |       |
| 2000                                                                                                                                                  | 0.910**                   | (0.02)    | 0.788                  | 0.826 | 0.844 | 0.874 | 0.903 | 0.934 | 0.962 | 0.978 | 1.012 |
| 2001                                                                                                                                                  | 0.961*                    | (0.09)    | 0.859                  | 0.888 | 0.901 | 0.923 | 0.950 | 0.977 | 0.999 | 1.010 | 1.037 |
| 2002                                                                                                                                                  | 0.925**                   | (0.03)    | 0.818                  | 0.844 | 0.858 | 0.888 | 0.921 | 0.949 | 0.973 | 0.992 | 1.028 |
| 2003                                                                                                                                                  | 0.960                     | (0.10)    | 0.859                  | 0.884 | 0.895 | 0.920 | 0.949 | 0.978 | 1.000 | 1.017 | 1.053 |
| 2004                                                                                                                                                  | 0.904***                  | (0.00)    | 0.839                  | 0.858 | 0.868 | 0.886 | 0.905 | 0.925 | 0.944 | 0.956 | 0.978 |
| 2005                                                                                                                                                  | 0.821***                  | (0.00)    | 0.765                  | 0.783 | 0.793 | 0.808 | 0.828 | 0.850 | 0.870 | 0.882 | 0.907 |
| 2006                                                                                                                                                  | 0.880***                  | (0.00)    | 0.814                  | 0.831 | 0.841 | 0.857 | 0.876 | 0.895 | 0.912 | 0.923 | 0.944 |
| 2007                                                                                                                                                  | 0.870***                  | (0.00)    | 0.795                  | 0.815 | 0.826 | 0.848 | 0.868 | 0.891 | 0.910 | 0.923 | 0.948 |
| 2008                                                                                                                                                  | 0.884***                  | (0.00)    | 0.801                  | 0.823 | 0.835 | 0.853 | 0.874 | 0.895 | 0.915 | 0.926 | 0.947 |
| 2009                                                                                                                                                  | 0.915***                  | (0.00)    | 0.843                  | 0.863 | 0.873 | 0.891 | 0.912 | 0.932 | 0.951 | 0.962 | 0.983 |
| 2010                                                                                                                                                  | 0.916***                  | (0.00)    | 0.842                  | 0.860 | 0.871 | 0.888 | 0.910 | 0.930 | 0.948 | 0.958 | 0.976 |
| 2011                                                                                                                                                  | 0.921***                  | (0.00)    | 0.849                  | 0.869 | 0.881 | 0.898 | 0.919 | 0.939 | 0.958 | 0.967 | 0.987 |
| 2012                                                                                                                                                  | 0.879***                  | (0.00)    | 0.825                  | 0.842 | 0.851 | 0.867 | 0.886 | 0.905 | 0.924 | 0.934 | 0.954 |
| 2013                                                                                                                                                  | 0.875***                  | (0.00)    | 0.813                  | 0.831 | 0.840 | 0.854 | 0.873 | 0.891 | 0.908 | 0.917 | 0.934 |
| 2014                                                                                                                                                  | 0.872***                  | (0.00)    | 0.824                  | 0.841 | 0.848 | 0.860 | 0.873 | 0.886 | 0.898 | 0.907 | 0.925 |
| Panel B: $\lambda_{p,h}^{conquer}$ for calendar-year portfolios, $p$ , with a forecast horizon of $h=3$ months prior to the end of the fiscal quarter |                           |           |                        |       |       |       |       |       |       |       |       |
| 2000                                                                                                                                                  | 0.811***                  | (0.00)    | 0.686                  | 0.718 | 0.738 | 0.769 | 0.804 | 0.838 | 0.869 | 0.886 | 0.925 |
| 2001                                                                                                                                                  | 0.709***                  | (0.00)    | 0.641                  | 0.660 | 0.672 | 0.689 | 0.710 | 0.733 | 0.761 | 0.780 | 0.812 |
| 2002                                                                                                                                                  | 0.775***                  | (0.00)    | 0.667                  | 0.701 | 0.716 | 0.748 | 0.784 | 0.821 | 0.857 | 0.878 | 0.914 |
| 2003                                                                                                                                                  | 0.767***                  | (0.00)    | 0.669                  | 0.699 | 0.715 | 0.742 | 0.769 | 0.799 | 0.826 | 0.843 | 0.880 |
| 2004                                                                                                                                                  | 0.824***                  | (0.00)    | 0.740                  | 0.768 | 0.783 | 0.811 | 0.837 | 0.867 | 0.896 | 0.919 | 0.947 |
| 2005                                                                                                                                                  | 0.811***                  | (0.00)    | 0.737                  | 0.759 | 0.770 | 0.791 | 0.813 | 0.836 | 0.858 | 0.871 | 0.896 |
| 2006                                                                                                                                                  | 0.832***                  | (0.00)    | 0.759                  | 0.782 | 0.795 | 0.815 | 0.839 | 0.863 | 0.886 | 0.899 | 0.924 |
| 2007                                                                                                                                                  | 0.872***                  | (0.00)    | 0.767                  | 0.798 | 0.814 | 0.838 | 0.865 | 0.890 | 0.914 | 0.926 | 0.948 |
| 2008                                                                                                                                                  | 0.843***                  | (0.00)    | 0.768                  | 0.792 | 0.803 | 0.822 | 0.841 | 0.862 | 0.881 | 0.892 | 0.915 |
| 2009                                                                                                                                                  | 0.779***                  | (0.00)    | 0.707                  | 0.727 | 0.738 | 0.756 | 0.775 | 0.797 | 0.815 | 0.826 | 0.847 |
| 2010                                                                                                                                                  | 0.821***                  | (0.00)    | 0.743                  | 0.764 | 0.774 | 0.790 | 0.810 | 0.829 | 0.846 | 0.856 | 0.874 |
| 2011                                                                                                                                                  | 0.790***                  | (0.00)    | 0.718                  | 0.737 | 0.748 | 0.768 | 0.789 | 0.810 | 0.828 | 0.840 | 0.860 |
| 2012                                                                                                                                                  | 0.820***                  | (0.00)    | 0.757                  | 0.774 | 0.784 | 0.800 | 0.818 | 0.836 | 0.854 | 0.866 | 0.888 |
| 2013                                                                                                                                                  | 0.796***                  | (0.00)    | 0.727                  | 0.746 | 0.755 | 0.771 | 0.788 | 0.805 | 0.820 | 0.830 | 0.847 |
| 2014                                                                                                                                                  | 0.844***                  | (0.00)    | 0.785                  | 0.801 | 0.810 | 0.826 | 0.844 | 0.861 | 0.877 | 0.887 | 0.908 |

Table OA.6: Bias-corrected  $\lambda_{p,h}^{beat}$  and  $\lambda_{p,h}^{conquer}$  Bootstrap Distributions by Dispersion and Size Portfolios with  $h=3$  Months

| Portfolio, $p$                                                                                                                                                    | $\lambda_{p,h}^{beat}$    | (p-value) | Bootstrap Distribution |       |       |       |       |       |       |       |       |
|-------------------------------------------------------------------------------------------------------------------------------------------------------------------|---------------------------|-----------|------------------------|-------|-------|-------|-------|-------|-------|-------|-------|
|                                                                                                                                                                   |                           |           | 1%                     | 5%    | 10%   | 25%   | 50%   | 75%   | 90%   | 95%   | 99%   |
| Panel A: Bias-corrected $\lambda_{p,h}^{beat}$ for dispersion portfolios, $p$ , with a forecast horizon of $h=3$ months prior to the end of the fiscal quarter    |                           |           |                        |       |       |       |       |       |       |       |       |
| 1 (Low)                                                                                                                                                           | 1.083                     | (0.99)    | 0.998                  | 1.020 | 1.033 | 1.053 | 1.077 | 1.101 | 1.122 | 1.134 | 1.156 |
| 2                                                                                                                                                                 | 0.929***                  | (0.01)    | 0.876                  | 0.892 | 0.901 | 0.914 | 0.929 | 0.946 | 0.963 | 0.977 | 0.999 |
| 3                                                                                                                                                                 | 0.862***                  | (0.00)    | 0.814                  | 0.829 | 0.837 | 0.849 | 0.863 | 0.878 | 0.893 | 0.902 | 0.919 |
| 4                                                                                                                                                                 | 0.763***                  | (0.00)    | 0.715                  | 0.729 | 0.736 | 0.749 | 0.763 | 0.776 | 0.788 | 0.794 | 0.808 |
| 5 (High)                                                                                                                                                          | 0.741***                  | (0.00)    | 0.699                  | 0.711 | 0.718 | 0.730 | 0.743 | 0.756 | 0.768 | 0.776 | 0.790 |
| Panel B: Bias-corrected $\lambda_{p,h}^{beat}$ for size portfolios, $p$ , with a forecast horizon of $h=3$ months prior to the end of the fiscal quarter          |                           |           |                        |       |       |       |       |       |       |       |       |
| 1 (Small)                                                                                                                                                         | 0.776***                  | (0.00)    | 0.716                  | 0.731 | 0.740 | 0.755 | 0.772 | 0.790 | 0.805 | 0.814 | 0.832 |
| 2                                                                                                                                                                 | 0.851***                  | (0.00)    | 0.800                  | 0.817 | 0.825 | 0.839 | 0.853 | 0.868 | 0.882 | 0.890 | 0.905 |
| 3                                                                                                                                                                 | 0.837***                  | (0.00)    | 0.787                  | 0.802 | 0.810 | 0.823 | 0.839 | 0.854 | 0.868 | 0.876 | 0.893 |
| 4                                                                                                                                                                 | 0.872***                  | (0.00)    | 0.806                  | 0.824 | 0.835 | 0.852 | 0.871 | 0.891 | 0.908 | 0.919 | 0.940 |
| 5 (Large)                                                                                                                                                         | 0.978                     | (0.24)    | 0.909                  | 0.931 | 0.943 | 0.960 | 0.980 | 0.999 | 1.017 | 1.028 | 1.048 |
| Portfolio, $p$                                                                                                                                                    | $\lambda_{p,h}^{conquer}$ | (p-value) | Bootstrap Distribution |       |       |       |       |       |       |       |       |
|                                                                                                                                                                   |                           |           | 1%                     | 5%    | 10%   | 25%   | 50%   | 75%   | 90%   | 95%   | 99%   |
| Panel C: Bias-corrected $\lambda_{p,h}^{conquer}$ for dispersion portfolios, $p$ , with a forecast horizon of $h=3$ months prior to the end of the fiscal quarter |                           |           |                        |       |       |       |       |       |       |       |       |
| 1 (Low)                                                                                                                                                           | 0.840***                  | (0.00)    | 0.794                  | 0.805 | 0.812 | 0.823 | 0.837 | 0.849 | 0.861 | 0.867 | 0.878 |
| 2                                                                                                                                                                 | 0.805***                  | (0.00)    | 0.766                  | 0.776 | 0.781 | 0.791 | 0.802 | 0.813 | 0.822 | 0.828 | 0.840 |
| 3                                                                                                                                                                 | 0.806***                  | (0.00)    | 0.774                  | 0.784 | 0.789 | 0.798 | 0.808 | 0.818 | 0.827 | 0.833 | 0.845 |
| 4                                                                                                                                                                 | 0.740***                  | (0.00)    | 0.707                  | 0.718 | 0.723 | 0.732 | 0.742 | 0.752 | 0.762 | 0.768 | 0.778 |
| 5 (High)                                                                                                                                                          | 0.722***                  | (0.00)    | 0.691                  | 0.700 | 0.705 | 0.714 | 0.725 | 0.736 | 0.747 | 0.754 | 0.766 |
| Panel D: Bias-corrected $\lambda_{p,h}^{conquer}$ for size portfolios, $p$ , with a forecast horizon of $h=3$ months prior to the end of the fiscal quarter       |                           |           |                        |       |       |       |       |       |       |       |       |
| 1 (Small)                                                                                                                                                         | 0.745***                  | (0.00)    | 0.702                  | 0.713 | 0.719 | 0.729 | 0.741 | 0.754 | 0.765 | 0.771 | 0.784 |
| 2                                                                                                                                                                 | 0.781***                  | (0.00)    | 0.753                  | 0.763 | 0.768 | 0.776 | 0.785 | 0.795 | 0.804 | 0.809 | 0.820 |
| 3                                                                                                                                                                 | 0.763***                  | (0.00)    | 0.728                  | 0.738 | 0.744 | 0.753 | 0.764 | 0.774 | 0.784 | 0.790 | 0.801 |
| 4                                                                                                                                                                 | 0.769***                  | (0.00)    | 0.734                  | 0.747 | 0.752 | 0.762 | 0.773 | 0.785 | 0.796 | 0.802 | 0.815 |
| 5 (Large)                                                                                                                                                         | 0.805***                  | (0.00)    | 0.761                  | 0.776 | 0.783 | 0.793 | 0.805 | 0.817 | 0.828 | 0.834 | 0.846 |

Table OA.7: Bias-corrected  $\lambda_{p,h}^{beat}$  Bootstrap Distributions by Industry Portfolio,  $p$ , and Forecast Horizon,  $h$

| Industry<br>Portfolio, $p$                                                                                                                                   | $\lambda_{p,h}^{beat}$ | (p-value) | Bootstrap Distribution |       |       |       |       |       |       |       |       |
|--------------------------------------------------------------------------------------------------------------------------------------------------------------|------------------------|-----------|------------------------|-------|-------|-------|-------|-------|-------|-------|-------|
|                                                                                                                                                              |                        |           | 1%                     | 5%    | 10%   | 25%   | 50%   | 75%   | 90%   | 95%   | 99%   |
| Panel A: Bias-corrected $\lambda_{p,h}^{beat}$ for industry portfolios, $p$ , with a forecast horizon of $h=0$ months prior to the end of the fiscal quarter |                        |           |                        |       |       |       |       |       |       |       |       |
| NODUR                                                                                                                                                        | 1.767                  | (1.00)    | 1.593                  | 1.646 | 1.674 | 1.719 | 1.771 | 1.827 | 1.884 | 1.914 | 1.978 |
| DURBL                                                                                                                                                        | 1.172                  | (0.99)    | 1.008                  | 1.051 | 1.076 | 1.115 | 1.161 | 1.209 | 1.250 | 1.275 | 1.320 |
| MANUF                                                                                                                                                        | 1.316                  | (1.00)    | 1.247                  | 1.266 | 1.277 | 1.295 | 1.315 | 1.335 | 1.353 | 1.364 | 1.385 |
| ENRGY                                                                                                                                                        | 1.138                  | (0.99)    | 1.002                  | 1.043 | 1.065 | 1.103 | 1.149 | 1.195 | 1.240 | 1.272 | 1.327 |
| HITEC                                                                                                                                                        | 1.174                  | (1.00)    | 1.111                  | 1.128 | 1.138 | 1.154 | 1.174 | 1.194 | 1.212 | 1.223 | 1.246 |
| TELCM                                                                                                                                                        | 1.076                  | (0.71)    | 0.718                  | 0.818 | 0.874 | 0.979 | 1.120 | 1.304 | 1.509 | 1.640 | 2.012 |
| SHOPS                                                                                                                                                        | 1.477                  | (1.00)    | 1.368                  | 1.399 | 1.415 | 1.441 | 1.473 | 1.502 | 1.528 | 1.547 | 1.582 |
| HLTH                                                                                                                                                         | 1.505                  | (1.00)    | 1.371                  | 1.414 | 1.436 | 1.474 | 1.515 | 1.554 | 1.592 | 1.613 | 1.659 |
| UTILS                                                                                                                                                        | 1.152                  | (0.94)    | 0.914                  | 0.990 | 1.026 | 1.092 | 1.166 | 1.251 | 1.332 | 1.390 | 1.495 |
| OTHER                                                                                                                                                        | 1.200                  | (1.00)    | 1.089                  | 1.122 | 1.141 | 1.169 | 1.203 | 1.239 | 1.278 | 1.299 | 1.344 |
| All                                                                                                                                                          | 1.309                  | (1.00)    | 1.270                  | 1.282 | 1.288 | 1.298 | 1.308 | 1.319 | 1.329 | 1.335 | 1.346 |
| Panel B: Bias-corrected $\lambda_{p,h}^{beat}$ for industry portfolios, $p$ , with a forecast horizon of $h=3$ months prior to the end of the fiscal quarter |                        |           |                        |       |       |       |       |       |       |       |       |
| NODUR                                                                                                                                                        | 0.841***               | (0.00)    | 0.792                  | 0.804 | 0.812 | 0.825 | 0.839 | 0.853 | 0.865 | 0.873 | 0.888 |
| DURBL                                                                                                                                                        | 0.773***               | (0.00)    | 0.667                  | 0.694 | 0.711 | 0.735 | 0.764 | 0.792 | 0.822 | 0.838 | 0.866 |
| MANUF                                                                                                                                                        | 0.731***               | (0.00)    | 0.684                  | 0.698 | 0.705 | 0.717 | 0.730 | 0.743 | 0.754 | 0.761 | 0.774 |
| ENRGY                                                                                                                                                        | 0.677                  | (0.25)    | 0.436                  | 0.502 | 0.561 | 0.642 | 0.805 | 0.993 | 1.166 | 1.344 | 1.614 |
| HITEC                                                                                                                                                        | 0.985                  | (0.36)    | 0.915                  | 0.936 | 0.948 | 0.967 | 0.987 | 1.011 | 1.032 | 1.044 | 1.067 |
| TELCM                                                                                                                                                        | 0.922**                | (0.04)    | 0.823                  | 0.852 | 0.868 | 0.894 | 0.922 | 0.952 | 0.979 | 0.997 | 1.025 |
| SHOPS                                                                                                                                                        | 0.942                  | (0.36)    | 0.666                  | 0.737 | 0.783 | 0.852 | 0.943 | 1.045 | 1.146 | 1.207 | 1.332 |
| HLTH                                                                                                                                                         | 0.825***               | (0.00)    | 0.749                  | 0.774 | 0.787 | 0.806 | 0.826 | 0.848 | 0.871 | 0.885 | 0.911 |
| UTILS                                                                                                                                                        | 0.853***               | (0.00)    | 0.829                  | 0.836 | 0.840 | 0.847 | 0.854 | 0.862 | 0.870 | 0.874 | 0.881 |
| OTHER                                                                                                                                                        | 0.000 <sup>0</sup>     | (0.00)    | 0.000                  | 0.000 | 0.000 | 0.000 | 0.000 | 0.000 | 0.000 | 0.000 | 0.000 |
| All                                                                                                                                                          | 0.000 <sup>0</sup>     | (0.00)    | 0.000                  | 0.000 | 0.000 | 0.000 | 0.000 | 0.000 | 0.000 | 0.000 | 0.000 |

Table OA.8: Bias-corrected  $\lambda_{p,h}^{conquer}$  Bootstrap Distributions by Industry Portfolio,  $p$ , and Forecast Horizon,  $h$

| Industry<br>Portfolio, $p$                                                                                                                                      | $\lambda_{p,h}^{conquer}$ | (p-value) | Bootstrap Distribution |       |       |       |       |       |       |       |       |
|-----------------------------------------------------------------------------------------------------------------------------------------------------------------|---------------------------|-----------|------------------------|-------|-------|-------|-------|-------|-------|-------|-------|
|                                                                                                                                                                 |                           |           | 1%                     | 5%    | 10%   | 25%   | 50%   | 75%   | 90%   | 95%   | 99%   |
| Panel A: Bias-corrected $\lambda_{p,h}^{conquer}$ for industry portfolios, $p$ , with a forecast horizon of $h=0$ months prior to the end of the fiscal quarter |                           |           |                        |       |       |       |       |       |       |       |       |
| NODUR                                                                                                                                                           | 1.001                     | (0.54)    | 0.924                  | 0.946 | 0.959 | 0.980 | 1.004 | 1.027 | 1.048 | 1.061 | 1.088 |
| DURBL                                                                                                                                                           | 0.910***                  | (0.01)    | 0.814                  | 0.839 | 0.852 | 0.875 | 0.901 | 0.929 | 0.954 | 0.967 | 0.997 |
| MANUF                                                                                                                                                           | 0.968**                   | (0.02)    | 0.932                  | 0.943 | 0.949 | 0.958 | 0.969 | 0.979 | 0.988 | 0.994 | 1.006 |
| ENRGY                                                                                                                                                           | 0.961                     | (0.21)    | 0.878                  | 0.900 | 0.915 | 0.940 | 0.966 | 0.995 | 1.021 | 1.038 | 1.068 |
| HITEC                                                                                                                                                           | 0.917***                  | (0.00)    | 0.880                  | 0.891 | 0.897 | 0.907 | 0.918 | 0.930 | 0.940 | 0.946 | 0.959 |
| TELCM                                                                                                                                                           | 0.973                     | (0.51)    | 0.710                  | 0.794 | 0.836 | 0.919 | 1.002 | 1.103 | 1.224 | 1.309 | 1.502 |
| SHOPS                                                                                                                                                           | 0.969*                    | (0.07)    | 0.914                  | 0.930 | 0.938 | 0.953 | 0.968 | 0.983 | 0.996 | 1.004 | 1.019 |
| HLTH                                                                                                                                                            | 1.024                     | (0.72)    | 0.941                  | 0.963 | 0.976 | 0.997 | 1.021 | 1.047 | 1.069 | 1.081 | 1.106 |
| UTILS                                                                                                                                                           | 0.875*                    | (0.06)    | 0.722                  | 0.768 | 0.790 | 0.835 | 0.875 | 0.927 | 0.970 | 1.004 | 1.067 |
| OTHER                                                                                                                                                           | 0.871***                  | (0.00)    | 0.821                  | 0.838 | 0.846 | 0.862 | 0.878 | 0.897 | 0.916 | 0.928 | 0.949 |
| All                                                                                                                                                             | 0.954***                  | (0.00)    | 0.933                  | 0.939 | 0.942 | 0.948 | 0.954 | 0.960 | 0.965 | 0.968 | 0.975 |
| Panel B: Bias-corrected $\lambda_{p,h}^{conquer}$ for industry portfolios, $p$ , with a forecast horizon of $h=3$ months prior to the end of the fiscal quarter |                           |           |                        |       |       |       |       |       |       |       |       |
| NODUR                                                                                                                                                           | 0.897***                  | (0.00)    | 0.832                  | 0.855 | 0.865 | 0.882 | 0.904 | 0.926 | 0.944 | 0.957 | 0.978 |
| DURBL                                                                                                                                                           | 0.708***                  | (0.00)    | 0.654                  | 0.670 | 0.680 | 0.696 | 0.716 | 0.739 | 0.759 | 0.770 | 0.795 |
| MANUF                                                                                                                                                           | 0.781***                  | (0.00)    | 0.739                  | 0.750 | 0.756 | 0.765 | 0.776 | 0.787 | 0.797 | 0.803 | 0.815 |
| ENRGY                                                                                                                                                           | 0.765***                  | (0.00)    | 0.690                  | 0.710 | 0.720 | 0.742 | 0.765 | 0.786 | 0.806 | 0.819 | 0.845 |
| HITEC                                                                                                                                                           | 0.720***                  | (0.00)    | 0.685                  | 0.695 | 0.700 | 0.709 | 0.719 | 0.729 | 0.738 | 0.743 | 0.754 |
| TELCM                                                                                                                                                           | 0.806                     | (0.29)    | 0.536                  | 0.630 | 0.686 | 0.767 | 0.865 | 1.023 | 1.147 | 1.308 | 1.595 |
| SHOPS                                                                                                                                                           | 0.829***                  | (0.00)    | 0.783                  | 0.798 | 0.804 | 0.816 | 0.830 | 0.845 | 0.860 | 0.869 | 0.885 |
| HLTH                                                                                                                                                            | 0.843***                  | (0.00)    | 0.770                  | 0.791 | 0.802 | 0.820 | 0.841 | 0.863 | 0.881 | 0.892 | 0.915 |
| UTILS                                                                                                                                                           | 0.753***                  | (0.01)    | 0.594                  | 0.652 | 0.669 | 0.716 | 0.763 | 0.822 | 0.882 | 0.912 | 0.977 |
| OTHER                                                                                                                                                           | 0.779***                  | (0.00)    | 0.716                  | 0.733 | 0.743 | 0.760 | 0.778 | 0.796 | 0.814 | 0.826 | 0.845 |
| All                                                                                                                                                             | 0.780***                  | (0.00)    | 0.763                  | 0.768 | 0.771 | 0.776 | 0.781 | 0.787 | 0.792 | 0.795 | 0.801 |

Table OA.9: Bias-corrected  $\lambda_{p,h}^{beat}$  Bootstrap Distributions by Calendar-year Portfolio,  $p$ , and Forecast Horizon,  $h$

| Calendar-year<br>Portfolio, $p$                                                                                                                                   | $\lambda_{p,h}^{beat}$ | (p-value) | Bootstrap Distribution |       |       |       |       |       |       |       |       |
|-------------------------------------------------------------------------------------------------------------------------------------------------------------------|------------------------|-----------|------------------------|-------|-------|-------|-------|-------|-------|-------|-------|
|                                                                                                                                                                   |                        |           | 1%                     | 5%    | 10%   | 25%   | 50%   | 75%   | 90%   | 95%   | 99%   |
| Panel A: Bias-corrected $\lambda_{p,h}^{beat}$ for calendar-year portfolios, $p$ , with a forecast horizon of $h=0$ months prior to the end of the fiscal quarter |                        |           |                        |       |       |       |       |       |       |       |       |
| 2000                                                                                                                                                              | 1.421                  | (1.00)    | 1.227                  | 1.275 | 1.304 | 1.353 | 1.416 | 1.481 | 1.556 | 1.603 | 1.687 |
| 2001                                                                                                                                                              | 1.248                  | (1.00)    | 1.089                  | 1.135 | 1.161 | 1.203 | 1.254 | 1.319 | 1.382 | 1.418 | 1.479 |
| 2002                                                                                                                                                              | 1.231                  | (1.00)    | 1.076                  | 1.121 | 1.144 | 1.188 | 1.241 | 1.296 | 1.345 | 1.376 | 1.438 |
| 2003                                                                                                                                                              | 1.375                  | (1.00)    | 1.200                  | 1.247 | 1.276 | 1.322 | 1.374 | 1.430 | 1.482 | 1.515 | 1.578 |
| 2004                                                                                                                                                              | 1.613                  | (1.00)    | 1.380                  | 1.444 | 1.482 | 1.546 | 1.612 | 1.682 | 1.749 | 1.787 | 1.852 |
| 2005                                                                                                                                                              | 1.367                  | (1.00)    | 1.212                  | 1.257 | 1.277 | 1.319 | 1.367 | 1.417 | 1.462 | 1.487 | 1.538 |
| 2006                                                                                                                                                              | 1.347                  | (1.00)    | 1.217                  | 1.261 | 1.282 | 1.317 | 1.355 | 1.398 | 1.443 | 1.472 | 1.525 |
| 2007                                                                                                                                                              | 1.348                  | (1.00)    | 1.175                  | 1.218 | 1.243 | 1.286 | 1.338 | 1.390 | 1.437 | 1.465 | 1.524 |
| 2008                                                                                                                                                              | 1.295                  | (1.00)    | 1.162                  | 1.198 | 1.220 | 1.254 | 1.294 | 1.334 | 1.371 | 1.393 | 1.433 |
| 2009                                                                                                                                                              | 1.216                  | (1.00)    | 1.091                  | 1.127 | 1.148 | 1.184 | 1.227 | 1.270 | 1.313 | 1.341 | 1.385 |
| 2010                                                                                                                                                              | 1.211                  | (1.00)    | 1.092                  | 1.123 | 1.140 | 1.173 | 1.212 | 1.256 | 1.295 | 1.322 | 1.368 |
| 2011                                                                                                                                                              | 1.121                  | (1.00)    | 1.038                  | 1.065 | 1.078 | 1.101 | 1.128 | 1.157 | 1.185 | 1.202 | 1.239 |
| 2012                                                                                                                                                              | 1.277                  | (1.00)    | 1.146                  | 1.184 | 1.207 | 1.243 | 1.284 | 1.325 | 1.363 | 1.386 | 1.433 |
| 2013                                                                                                                                                              | 1.370                  | (1.00)    | 1.239                  | 1.284 | 1.303 | 1.335 | 1.370 | 1.401 | 1.431 | 1.451 | 1.492 |
| 2014                                                                                                                                                              | 1.327                  | (1.00)    | 1.217                  | 1.251 | 1.270 | 1.302 | 1.333 | 1.366 | 1.397 | 1.418 | 1.459 |
| Panel B: Bias-corrected $\lambda_{p,h}^{beat}$ for calendar-year portfolios, $p$ , with a forecast horizon of $h=3$ months prior to the end of the fiscal quarter |                        |           |                        |       |       |       |       |       |       |       |       |
| 2000                                                                                                                                                              | 0.797***               | (0.00)    | 0.699                  | 0.727 | 0.745 | 0.776 | 0.816 | 0.859 | 0.898 | 0.927 | 0.975 |
| 2001                                                                                                                                                              | 0.705***               | (0.00)    | 0.588                  | 0.620 | 0.638 | 0.669 | 0.700 | 0.734 | 0.768 | 0.787 | 0.822 |
| 2002                                                                                                                                                              | 0.799***               | (0.00)    | 0.662                  | 0.701 | 0.721 | 0.758 | 0.794 | 0.835 | 0.869 | 0.893 | 0.940 |
| 2003                                                                                                                                                              | 0.855***               | (0.00)    | 0.736                  | 0.771 | 0.792 | 0.821 | 0.853 | 0.885 | 0.914 | 0.931 | 0.965 |
| 2004                                                                                                                                                              | 0.980                  | (0.33)    | 0.834                  | 0.877 | 0.896 | 0.934 | 0.973 | 1.017 | 1.053 | 1.071 | 1.114 |
| 2005                                                                                                                                                              | 0.974                  | (0.27)    | 0.817                  | 0.858 | 0.880 | 0.917 | 0.961 | 1.004 | 1.039 | 1.063 | 1.114 |
| 2006                                                                                                                                                              | 1.001                  | (0.42)    | 0.877                  | 0.906 | 0.924 | 0.955 | 0.990 | 1.023 | 1.055 | 1.075 | 1.111 |
| 2007                                                                                                                                                              | 0.861***               | (0.00)    | 0.750                  | 0.782 | 0.799 | 0.827 | 0.860 | 0.893 | 0.924 | 0.943 | 0.982 |
| 2008                                                                                                                                                              | 0.931*                 | (0.08)    | 0.837                  | 0.866 | 0.880 | 0.902 | 0.935 | 0.967 | 0.994 | 1.013 | 1.048 |
| 2009                                                                                                                                                              | 0.814***               | (0.00)    | 0.723                  | 0.747 | 0.761 | 0.785 | 0.813 | 0.841 | 0.867 | 0.885 | 0.915 |
| 2010                                                                                                                                                              | 0.785***               | (0.00)    | 0.697                  | 0.722 | 0.735 | 0.758 | 0.784 | 0.811 | 0.835 | 0.851 | 0.875 |
| 2011                                                                                                                                                              | 0.756***               | (0.00)    | 0.668                  | 0.692 | 0.705 | 0.727 | 0.751 | 0.776 | 0.799 | 0.812 | 0.837 |
| 2012                                                                                                                                                              | 0.845***               | (0.00)    | 0.762                  | 0.785 | 0.798 | 0.817 | 0.840 | 0.863 | 0.885 | 0.897 | 0.924 |
| 2013                                                                                                                                                              | 0.905**                | (0.01)    | 0.809                  | 0.837 | 0.851 | 0.876 | 0.905 | 0.933 | 0.959 | 0.974 | 1.001 |
| 2014                                                                                                                                                              | 0.921**                | (0.04)    | 0.833                  | 0.857 | 0.871 | 0.894 | 0.921 | 0.947 | 0.974 | 0.992 | 1.022 |

Table OA.10: Bias-corrected  $\lambda_{p,h}^{conquer}$  Bootstrap Distributions by Calendar-year Portfolio,  $p$ , and Forecast Horizon,  $h$

| Calendar-year<br>Portfolio, $p$                                                                                                                                      | $\lambda_{p,h}^{conquer}$ | (p-value) | Bootstrap Distribution |       |       |       |       |       |       |       |       |
|----------------------------------------------------------------------------------------------------------------------------------------------------------------------|---------------------------|-----------|------------------------|-------|-------|-------|-------|-------|-------|-------|-------|
|                                                                                                                                                                      |                           |           | 1%                     | 5%    | 10%   | 25%   | 50%   | 75%   | 90%   | 95%   | 99%   |
| Panel A: Bias-corrected $\lambda_{p,h}^{conquer}$ for calendar-year portfolios, $p$ , with a forecast horizon of $h=0$ months prior to the end of the fiscal quarter |                           |           |                        |       |       |       |       |       |       |       |       |
| 2000                                                                                                                                                                 | 0.984                     | (0.48)    | 0.895                  | 0.922 | 0.937 | 0.964 | 0.997 | 1.033 | 1.070 | 1.093 | 1.135 |
| 2001                                                                                                                                                                 | 0.945                     | (0.15)    | 0.859                  | 0.882 | 0.895 | 0.917 | 0.946 | 0.980 | 1.012 | 1.030 | 1.064 |
| 2002                                                                                                                                                                 | 0.872***                  | (0.00)    | 0.781                  | 0.808 | 0.823 | 0.846 | 0.873 | 0.903 | 0.929 | 0.944 | 0.974 |
| 2003                                                                                                                                                                 | 0.909**                   | (0.02)    | 0.825                  | 0.852 | 0.863 | 0.886 | 0.914 | 0.942 | 0.966 | 0.980 | 1.011 |
| 2004                                                                                                                                                                 | 1.037                     | (0.81)    | 0.933                  | 0.965 | 0.982 | 1.010 | 1.040 | 1.070 | 1.096 | 1.115 | 1.155 |
| 2005                                                                                                                                                                 | 0.930**                   | (0.03)    | 0.833                  | 0.858 | 0.871 | 0.894 | 0.919 | 0.947 | 0.974 | 0.989 | 1.013 |
| 2006                                                                                                                                                                 | 0.981                     | (0.35)    | 0.894                  | 0.921 | 0.935 | 0.957 | 0.985 | 1.012 | 1.037 | 1.051 | 1.082 |
| 2007                                                                                                                                                                 | 0.948                     | (0.11)    | 0.857                  | 0.880 | 0.896 | 0.921 | 0.948 | 0.975 | 1.003 | 1.020 | 1.050 |
| 2008                                                                                                                                                                 | 0.956                     | (0.11)    | 0.877                  | 0.901 | 0.912 | 0.932 | 0.956 | 0.979 | 1.001 | 1.015 | 1.044 |
| 2009                                                                                                                                                                 | 0.984                     | (0.42)    | 0.918                  | 0.939 | 0.949 | 0.969 | 0.993 | 1.016 | 1.039 | 1.052 | 1.077 |
| 2010                                                                                                                                                                 | 0.970                     | (0.16)    | 0.889                  | 0.911 | 0.923 | 0.941 | 0.964 | 0.989 | 1.012 | 1.027 | 1.053 |
| 2011                                                                                                                                                                 | 0.906***                  | (0.00)    | 0.836                  | 0.856 | 0.867 | 0.884 | 0.902 | 0.921 | 0.939 | 0.950 | 0.970 |
| 2012                                                                                                                                                                 | 0.939**                   | (0.05)    | 0.880                  | 0.898 | 0.909 | 0.927 | 0.947 | 0.968 | 0.987 | 0.999 | 1.024 |
| 2013                                                                                                                                                                 | 0.965                     | (0.11)    | 0.900                  | 0.920 | 0.930 | 0.947 | 0.963 | 0.982 | 1.002 | 1.015 | 1.037 |
| 2014                                                                                                                                                                 | 0.973                     | (0.15)    | 0.908                  | 0.927 | 0.937 | 0.954 | 0.972 | 0.990 | 1.006 | 1.017 | 1.034 |
| Panel B: Bias-corrected $\lambda_{p,h}^{conquer}$ for calendar-year portfolios, $p$ , with a forecast horizon of $h=3$ months prior to the end of the fiscal quarter |                           |           |                        |       |       |       |       |       |       |       |       |
| 2000                                                                                                                                                                 | 0.720***                  | (0.00)    | 0.636                  | 0.663 | 0.676 | 0.705 | 0.735 | 0.766 | 0.794 | 0.813 | 0.847 |
| 2001                                                                                                                                                                 | 0.726***                  | (0.00)    | 0.654                  | 0.675 | 0.687 | 0.706 | 0.732 | 0.759 | 0.783 | 0.797 | 0.825 |
| 2002                                                                                                                                                                 | 0.745***                  | (0.00)    | 0.660                  | 0.687 | 0.700 | 0.722 | 0.747 | 0.775 | 0.802 | 0.821 | 0.858 |
| 2003                                                                                                                                                                 | 0.809***                  | (0.00)    | 0.698                  | 0.729 | 0.743 | 0.770 | 0.799 | 0.826 | 0.848 | 0.863 | 0.885 |
| 2004                                                                                                                                                                 | 0.829***                  | (0.00)    | 0.731                  | 0.753 | 0.769 | 0.793 | 0.818 | 0.845 | 0.867 | 0.882 | 0.912 |
| 2005                                                                                                                                                                 | 0.846***                  | (0.00)    | 0.742                  | 0.769 | 0.785 | 0.811 | 0.842 | 0.874 | 0.903 | 0.920 | 0.950 |
| 2006                                                                                                                                                                 | 0.889***                  | (0.00)    | 0.793                  | 0.819 | 0.832 | 0.855 | 0.881 | 0.909 | 0.935 | 0.949 | 0.981 |
| 2007                                                                                                                                                                 | 0.792***                  | (0.00)    | 0.722                  | 0.741 | 0.753 | 0.770 | 0.791 | 0.812 | 0.831 | 0.843 | 0.867 |
| 2008                                                                                                                                                                 | 0.828***                  | (0.00)    | 0.769                  | 0.786 | 0.795 | 0.811 | 0.828 | 0.846 | 0.864 | 0.874 | 0.896 |
| 2009                                                                                                                                                                 | 0.831***                  | (0.00)    | 0.748                  | 0.770 | 0.782 | 0.800 | 0.822 | 0.845 | 0.864 | 0.876 | 0.901 |
| 2010                                                                                                                                                                 | 0.766***                  | (0.00)    | 0.709                  | 0.727 | 0.736 | 0.752 | 0.770 | 0.788 | 0.806 | 0.816 | 0.837 |
| 2011                                                                                                                                                                 | 0.687***                  | (0.00)    | 0.626                  | 0.642 | 0.652 | 0.666 | 0.683 | 0.702 | 0.717 | 0.726 | 0.745 |
| 2012                                                                                                                                                                 | 0.749***                  | (0.00)    | 0.687                  | 0.704 | 0.713 | 0.729 | 0.748 | 0.765 | 0.780 | 0.791 | 0.810 |
| 2013                                                                                                                                                                 | 0.787***                  | (0.00)    | 0.727                  | 0.744 | 0.753 | 0.771 | 0.791 | 0.810 | 0.827 | 0.839 | 0.858 |
| 2014                                                                                                                                                                 | 0.825***                  | (0.00)    | 0.763                  | 0.781 | 0.790 | 0.807 | 0.824 | 0.844 | 0.861 | 0.872 | 0.893 |
